# Supplementary material for: In depth annotation of the Anopheles gambiae mosquito midgut transcriptome
Source: PubMed Central journal article supplement (PMC4131051; doi:10.1186/1471-2164-15-636), 2014-07-29
Supplement: 12864_2014_6335_MOESM3_ESM.pdf [file 12864_2014_6335_MOESM3_ESM.pdf]

Table S3. Validation of expression of *Anopheles gambiae* midgut novel transcripts by qRT-PCR.

Validation of transcript expression by qRT-PCR was done in an independent *A. gambiae* midgut sample. The primers used, amplicon size, Cufflinks class code, FPKM and detection results are indicated.

| Transcript ID  | Primer F                   | Primer R                   | Amplicon Size | Class code | FPKM     | Detected? |
|----------------|----------------------------|----------------------------|---------------|------------|----------|-----------|
| TCONS_00006299 | CAATTTGCACACAAATAAAC       | TAAGCAGACAAGTGACATTAG      | 150           | o          | 0.306869 | Yes       |
| TCONS_00003756 | ATAAACACATACGAACAGAGAGAC   | TTGTGAGCTCTTTGTTGAC        | 150           | u          | 0.393754 | Yes       |
| TCONS_00011544 | TCTCTCTCTCTCTCTCTTTAC      | ACTACCCTGTAGAAGTCAACTAA    | 150           | o          | 0.461712 | Yes       |
| TCONS_00024341 | ATTTGGATGGTAATACTGCATAC    | TGTTATACATGTTTCATTTGCGT    | 150           | u          | 0.463521 | Yes       |
| TCONS_00005711 | GAAAAATGAAGAAGGTGAAGAAC    | GACAATCGGTTCTCTCAG         | 150           | e          | 0.506611 | Yes       |
| TCONS_00009632 | CAGCGTCAATTACGATACG        | GATAGTCCGATAATATTTCTCT     | 150           | u          | 0.530405 | Yes       |
| TCONS_00019129 | TAAAAACGGAAGTGAATGAG       | GAACGATAAACTACGATACGAG     | 150           | u          | 0.55613  | Yes       |
| TCONS_00000582 | ACTACAAAATGCATCTCTATCTG    | TTCTTTGTATTACGCTACTTTACG   | 150           | e          | 0.559452 | Yes       |
| TCONS_00011333 | GGTGTGTATGTGTGAGTATTTG     | GTATTTAAGCCCTTTGTTAACTTG   | 150           | u          | 0.592527 | No        |
| TCONS_00005591 | TATATACTGTGCGATGATTATATGG  | ACAAAAGATATACTCCTTTAGATG   | 150           | p          | 0.808216 | No        |
| TCONS_00005686 | TTCCATTTACTAAACAACTGTAACCT | TATATGAAGTCCAACTCCAGTG     | 150           | p          | 0.86968  | Yes       |
| TCONS_00024038 | CATATACAGTCTCAGATGATAAAAC  | AGTGTCACTAGAGACGAAG        | 150           | u          | 0.884429 | No        |
| TCONS_00017003 | AAAACTTAATCGAAATCGTCTC     | GATTCTGTACTGATTTTGACTC     | 150           | p          | 0.936899 | Yes       |
| TCONS_00021911 | GTAATCTGTACTGTACTCGACTG    | AGTTCATCTTAAACACATACAC     | 149           | u          | 0.989295 | Yes       |
| TCONS_00024695 | TTAATAAAACACACACACACAC     | TATACTGGGTAATGCACAG        | 151           | u          | 0.992318 | Yes       |
| TCONS_00007720 | AATCTAGAGAGTACAATCGAAAC    | CGTAGTCGAGAAATAGATTTAG     | 148           | u          | 1.019166 | Yes       |
| TCONS_00024309 | ACTCGTATGACTTAAACAACATGAAC | AAATGTCTCAATATGCTGGTTAC    | 150           | u          | 1.05593  | Yes       |
| TCONS_00024266 | CATACCTACGAAAAACCGATG      | GATGTCAAAATGTTTTACTTCCAC   | 150           | p          | 1.146248 | Yes       |
| TCONS_00012845 | TAATTACGTTTATAAGCTAACAC    | CGGTGTATAGTGTGATGATG       | 150           | u          | 1.180639 | Yes       |
| TCONS_00007648 | GTGTAGAATGTGTTGTTTATTG     | CTTAGGGTAACCTAACGCTATC     | 150           | u          | 1.197861 | Yes       |
| TCONS_00005769 | TTTTAGGGTTTTTTGTTGTTGTTG   | TATGTTCCGTTGATTTATAATCCC   | 150           | i          | 1.333727 | Yes       |
| TCONS_00024315 | CTACGGTTCATCAAGTGC         | ATAACACTCCACCACATCC        | 150           | u          | 1.384962 | Yes       |
| TCONS_00009216 | ACTAGCAAAACACAATCGCTC      | GATTTGTTTTCTTTTGCTG        | 150           | u          | 1.407028 | Yes       |
| TCONS_00021375 | AACACGTAGAATAAACCAAGG      | GCTGTAACGTAAAGTTGACTC      | 150           | u          | 1.496962 | Yes       |
| TCONS_00023257 | GACATCTTGAATGTGATTATGTTG   | CTCTCTCTCTTTCTGTCTCTC      | 150           | u          | 1.521614 | No        |
| TCONS_00034103 | TTTCTACGGTAGCTTTACTTC      | ACATGAACATGATTGTATCC       | 150           | u          | 1.602879 | Yes       |
| TCONS_00017437 | GGAAATAGCGTTGATTTAGC       | CACTGATATGTAGAGTGTGTAGA    | 149           | u          | 1.633662 | Yes       |
| TCONS_00013184 | AACTCACACATACACTCAAAAG     | AAACTGATAAGAGACTGCTACTAC   | 600           | j          | 1.645551 | Yes       |
| TCONS_00005060 | ATGAGTTAAACATGGAAAGAC      | GTTATCTGTATACATTTACTTTTC   | 149           | u          | 1.648681 | No        |
| TCONS_00005000 | TGAGCTTATACTAGTTCTTTTGG    | GGTTAGTTTAAATACATACCAACATC | 150           | u          | 1.652122 | Yes       |
| TCONS_00005001 | TTCTACTGGTTCTATTATTACCG    | ATCTGTCTTTCTGATCTTTAC      | 150           | u          | 1.702571 | Yes       |
| TCONS_00018857 | GTATCGCATTACTCGAAAAATAAG   | TCAGCTGTCTTATTCTTCTCTC     | 600           | j          | 1.715457 | Yes       |
| TCONS_00009945 | CTGAAGCATCTGATGAACACTACTAC | GACGTACTCTCGTTGAGG         | 600           | j          | 1.813174 | Yes       |
| TCONS_00028506 | TAACAAAGCACTACCTCAAGC      | AGGTGACTTCACACTGTCC        | 600           | =          | 1.836078 | Yes       |
| TCONS_00010621 | CTATTGCAAACTCGTGTAGTATATG  | GTGTCCCACTAGTCTTACAAAATC   | 599           | i          | 1.870046 | Yes       |
| TCONS_00036217 | GATGAAGAGGAAGATGACGAG      | GAACAGGACAGGACCGAG         | 600           | =          | 1.968085 | Yes       |
| TCONS_00030238 | GTTTCAGATTTCTTTCTCATT      | GTCTGAAATTAACGAGCTGTAG     | 600           | =          | 2.033674 | Yes       |
| TCONS_00014056 | GAGATAATGGACACATATCAGAAG   | ACTTTCACCATCTGAAGCTATAC    | 601           | =          | 2.064097 | Yes       |
| TCONS_00022107 | GATCGCTTTATATATTGTTAGCAC   | TATTTTATAACGACGATGTGTTG    | 599           | p          | 2.175829 | No        |
| TCONS_00016970 | TGTAGTCTAAATCTCTTTCCCTTAG  | GTCTGCTACATAAAAACAAAACCTG  | 600           | j          | 2.221265 | Yes       |
| TCONS_00001231 | TCGTTTTGATAAACTCGATAAC     | TATCTGTTAAGAACGTTTCCAG     | 601           | =          | 2.320936 | Yes       |
| TCONS_00007415 | GAGAAGTACATATATTGCATACC    | CATTGTTTACCATCTGTACC       | 150           | u          | 2.328564 | Yes       |
| TCONS_00016414 | CTAAAAATGCTTCCCAATG        | ATACATTGGTAGCGAAATGAC      | 600           | =          | 2.431768 | No        |
| TCONS_00032866 | GGCAGATATAAGATGATAACG      | GCCCTGTACATTTCAAAC         | 149           | u          | 2.465282 | Yes       |
| TCONS_00022447 | TCTAGGAGGAGATGACCAG        | CCAGTAATGGTCTAATAAATTG     | 149           | u          | 2.495375 | Yes       |
| TCONS_00016620 | ATTGCGATAAAAGGCAAC         | ATCTTAATGATGCTTGAACCT      | 604           | j          | 2.552828 | Yes       |
| TCONS_00005525 | ATGCTATCGATTTATGTTAGTC     | GTACGATGTACAGCATAAGAG      | 151           | u          | 2.55412  | No        |
| TCONS_00005695 | GTTAGATTTGTAATGTTGACTC     | GAGAGAGAGAGAGAGAGAGAGA     | 150           | u          | 2.641962 | No        |
| TCONS_00025373 | ATTCAGTGTGACATACATATCC     | GTTCTGTTTCAATTTGTCG        | 154           | u          | 2.673924 | Yes       |
| TCONS_00016462 | CGACGGCTTTGATTTGTA         | GGAAAATCAGGTGTGCCAGT       | 425           | i          | 2.733234 | Yes       |
| TCONS_00022002 | GTAGGAAAAAGGGGTGAGC        | CCGCAATCAATTTGGAGTC        | 226           | u          | 3.052776 | Yes       |
| TCONS_00006269 | GCCTTGCTCGAGTATGTACGA      | GTCCAATACCGCCGAGAGT        | 304           | u          | 3.310948 | Yes       |
| TCONS_00017751 | AAGTCGACGGATTACCACGA       | CCGTTCAATTTGATCAACC        | 203           | u          | 3.495017 | Yes       |
| TCONS_00032244 | GATTGCAGCAACAGAGATAGC      | AGAACGCAACACGCATACAG       | 205           | u          | 3.692191 | Yes       |
| TCONS_00021987 | CCGCTATCGAATCTTTGGAG       | GCTACGCTGACGAAAAAGTACA     | 226           | u          | 3.733785 | Yes       |
| TCONS_00027665 | GCGGTTATCTTTGTCGTTG        | GCAGAATGGTTGGGATATTG       | 203           | u          | 4.170971 | Yes       |

\* Cufflinks class codes:

- = Complete match of intron chain.
- c Contained.
- j Potentially novel isoform (fragment): at least one splice junction is shared with a reference transcript.
- e Single exon transfrag overlapping a reference exon and at least 10 bp of a reference intron, indicating a possible pre-mRNA fragment.
- i A transfrag falling entirely within a reference intron.
- o Generic exonic overlap with a reference transcript.
- p Possible polymerase run-on fragment (within 2Kbases of a reference transcript).
- r Repeat. Currently determined by looking at the soft-masked reference sequence and applied to transcripts where at least 50% of the bases are lower case.
- u Unknown, intergenic transcript.
- x Exonic overlap with reference on the opposite strand.
- s An intron of the transfrag overlaps a reference intron on the opposite strand (likely due to read mapping errors).
- . tracking file only, indicates multiple classifications.
