# Supplementary material for: In depth annotation of the Anopheles gambiae mosquito midgut transcriptome
Source: PubMed Central journal article supplement (PMC4131051; doi:10.1186/1471-2164-15-636), 2014-07-29
Supplement: 12864_2014_6335_MOESM4_ESM.pdf [file 12864_2014_6335_MOESM4_ESM.pdf]

Table S4. Validation of novel intron-exon splice variants in the *Anopheles gambiae* midgut transcriptome. Validation of novel intron-exon splice variants by qRT-PCR was done in an independent *A. gambiae* midgut sample. The primers used, amplicon size, Cufflinks class code, FPKM and detection results are indicated.

| Transcript ID   | Primer F                | Primer R                 | Amplicon Size | Class code | FPKM      | Detected? |
|-----------------|-------------------------|--------------------------|---------------|------------|-----------|-----------|
| TCONS_00027482  | CTGGTTATAAGCATGGCCAAA   | CACCTTGTCTTGCTAAATTGC    | 150           | j          | 0.0678    | No        |
| TCONS_00027565  | CGAGGAAATCCTACCGTTGA    | TTGTTGCACACCCTTCTTA      | 150           | j          | 0.0923    | No        |
| TCONS_00027489  | CCACCGCACTATCTTCTTG     | ATCAGCAGCAGCAAAGGAAG     | 150           | j          | 0.345     | No        |
| TCONS_00005218  | GACCCGGATGCTGAACCACTA   | AGCAGCAGCAACAACAACAG     | 150           | j          | 0.417051  | Yes       |
| TCONS_00011735  | GGAACTGGTGGACGGTACTC    | AAGCGAAACACCTGTTGCAT     | 150           | j          | 0.429486  | Yes       |
| TCONS_00004941  | CCAAAGGATGCGAATAGACC    | GTTTGTCTTATTATAACTGCACTG | 150           | j          | 0.437805  | Yes       |
| TCONS_00001332  | CTTCGTGAACAGCATGTAATCC  | GGTCCAATCACGTCCAG        | 150           | j          | 0.444943  | Yes       |
| TCONS_00013786  | GGATGCAAAATCGAGTACAGAAA | GCTTCCGGTCAATGTCTAGC     | 150           | j          | 0.449991  | Yes       |
| TCONS_00011161  | AGACAGGCTGTTTCGACGTTT   | CCTTGAAGATAAAACAACAACAA  | 150           | j          | 0.474432  | Yes       |
| TCONS_00020202  | TTTCGGAATCTTTCGCATTT    | TGGAAACCAATGCTGATTTG     | 150           | j          | 0.594295  | Yes       |
| TCONS_00029731  | AGTGATCGTAATCGAAGCACA   | GCACGCTTTTCTTCTCTTTT     | 150           | j          | 0.650438  | Yes       |
| TCONS_00021567  | ATGGCTATCAGCGAGATGG     | GTGCAGTGAGAAATGGGGAAT    | 150           | j          | 0.724242  | Yes       |
| TCONS_00026189  | AGCAACTCGTGTGGTAAGC     | GCTGAAGATAAGCAGCTCAA     | 150           | j          | 0.925491  | Yes       |
| TCONS_00031675  | CTTGTTCCGTTTGTGCGATGA   | AACCACGGTGGCACCTATT      | 150           | j          | 1.050692  | Yes       |
| TCONS_00027557  | TCTCCGGCACAAGATGATG     | AGCACATCACAACCCACA       | 150           | j          | 1.254     | No        |
| TCONS_00023693  | CCCATACAGCCGAGAAACAT    | TCACGCAAATGATGACGAAG     | 150           | j          | 1.475705  | Yes       |
| TCONS_00027440  | CCGATGAAGTTGTCCAGGAT    | GATACTGGCGCTCACCAAC      | 150           | j          | 2.013     | No        |
| TCONS_00028689  | GACGTCGTTGCGGAATTACT    | CATCAACAAGCAGCAGCAC      | 150           | j          | 2.733843  | Yes       |
| TCONS_00031369  | CTACCGGGCCATTATTCTGT    | GATACTTCTCCCGCTGCT       | 150           | j          | 3.817812  | Yes       |
| TCONS_00023667a | TGCAAGATAGACGCAATTGAA   | CGCCATTTTAACTATTCTGA     | 150           | j          | 3.97981   | Yes       |
| TCONS_00023667b | TCAGCGTTCTCAGCAATGTC    | TCTGCTTAGCTCCACAGCA      | 150           | j          | 3.97981   | Yes       |
| TCONS_00023667c | ACCATTCAAAGGGTTCGAGA    | CCCCTGACATGGGAGTTTC      | 150           | j          | 3.97981   | Yes       |
| TCONS_00031187  | CAAACAATAGGGGAAAGAGC    | GTGTAAGCGCCATCAAAGC      | 150           | j          | 4.592884  | Yes       |
| TCONS_00015197  | GCAATTCTGGTTGCCTTTTT    | CAAAGTTCCTGGATTGAAGTG    | 150           | j          | 4.94972   | Yes       |
| TCONS_00001593  | GCGCTTCATCATTGAAAG      | GCTAAATGTAGCGCCAGAA      | 150           | j          | 5.13354   | Yes       |
| TCONS_00038198  | CTGCTCCAGCTCCTTCTGC     | AGCTCCGAGGAGGATGAAG      | 150           | j          | 6.507286  | Yes       |
| TCONS_00026773  | GTCCGCGTGAACATTTGC      | GTACTTGACCGGACGCATCT     | 150           | j          | 6.714745  | Yes       |
| TCONS_00028562  | CTGCTGCTGCTGCTGCT       | CCACTTCCCTGTAGTGCCTA     | 150           | j          | 6.800724  | Yes       |
| TCONS_00001007  | TCGTGGTGTACTGACGCACT    | GGAGCAGGGGAAATTTGTA      | 150           | j          | 7.56145   | Yes       |
| TCONS_00018911  | GCTTACGCTACAGCATCGTG    | ATCGCTCCGAGTAGAGATGC     | 150           | j          | 30.586961 | Yes       |
| TCONS_00018644  | AAACAGCCAACATGCGAAAC    | CCAGGTTGCGTTCGTACAG      | 150           | j          | 69.855885 | Yes       |

\* Cufflinks class codes:

j Potentially novel isoform (fragment): at least one splice junction is shared with a reference transcript.
