# Supplementary material for: In depth annotation of the Anopheles gambiae mosquito midgut transcriptome
Source: PubMed Central journal article supplement (PMC4131051; doi:10.1186/1471-2164-15-636), 2014-07-29
Supplement: 12864_2014_6335_MOESM6_ESM.pdf [file 12864_2014_6335_MOESM6_ESM.pdf]

Table S6

| Functional Class              | Transcripts |       |              |       |                 |       |
|-------------------------------|-------------|-------|--------------|-------|-----------------|-------|
|                               | Total       | %     | Prev. Annot. | %     | Potential Novel | %     |
| Unknown                       | 12981       | 56.71 | 1079         | 19.68 | 11902           | 68.38 |
| RNA Proc., Transc & Transl    | 2054        | 8.97  | 983          | 17.93 | 1071            | 6.15  |
| Signal Transduction           | 1705        | 7.45  | 581          | 10.60 | 1124            | 6.46  |
| Metabolism                    | 1590        | 6.95  | 898          | 16.38 | 692             | 3.98  |
| Cytosk, Stor, Secr, Extr Mtrx | 1124        | 4.91  | 413          | 7.53  | 711             | 4.08  |
| Transporters and Channels     | 596         | 2.60  | 248          | 4.52  | 348             | 2.00  |
| Post Transl Mod & Prot Mach   | 574         | 2.51  | 313          | 5.71  | 261             | 1.50  |
| Nuclear Export and Regulation | 559         | 2.44  | 255          | 4.65  | 304             | 1.75  |
| Protein Export Machinery      | 541         | 2.36  | 264          | 4.81  | 277             | 1.59  |
| Peptidases & Prot. Inhibitors | 275         | 1.20  | 137          | 2.50  | 138             | 0.79  |
| Transposable elements         | 243         | 1.06  | 14           | 0.26  | 229             | 1.32  |
| Apoptosis                     | 222         | 0.97  | 79           | 1.44  | 143             | 0.82  |
| Detoxification                | 216         | 0.94  | 127          | 2.32  | 89              | 0.51  |
| Immunity                      | 204         | 0.89  | 92           | 1.68  | 112             | 0.64  |
| Viral product                 | 5           | 0.02  | 0            | 0.00  | 5               | 0.03  |
| Total                         | 22889       | 100   | 5483         | 100   | 17406           | 100   |

Table. S6. Functional classification of *An. gambiae* midgut transcripts from a genome-based analysis. Previously annotated Cufflinks transcripts correspond to a complete match to the reference annotation. Potentially novel transcripts encompass every other Cufflinks transcript class (see Table 1). “RNA proc., Transc & Transl”: RNA Processing, Transcription, Translation; “Cytosk/Stor/Secr/ExMtrx”: Cytoskeletal, Secretion, Extracellular Matrix; “Post transl mod /Prot mach”: Post-translational modification and proteasome machinery; “Peptidases & Prot. inhibitors”: Protease and protease inhibitors.
